# Supplementary figures and images for: Dual RNA Sequencing of Vitis vinifera during Lasiodiplodia theobromae Infection Unveils Host–Pathogen Interactions
Source: MDPI journal article supplement (doi:10.3390/ijms20236083), 2019-12-03

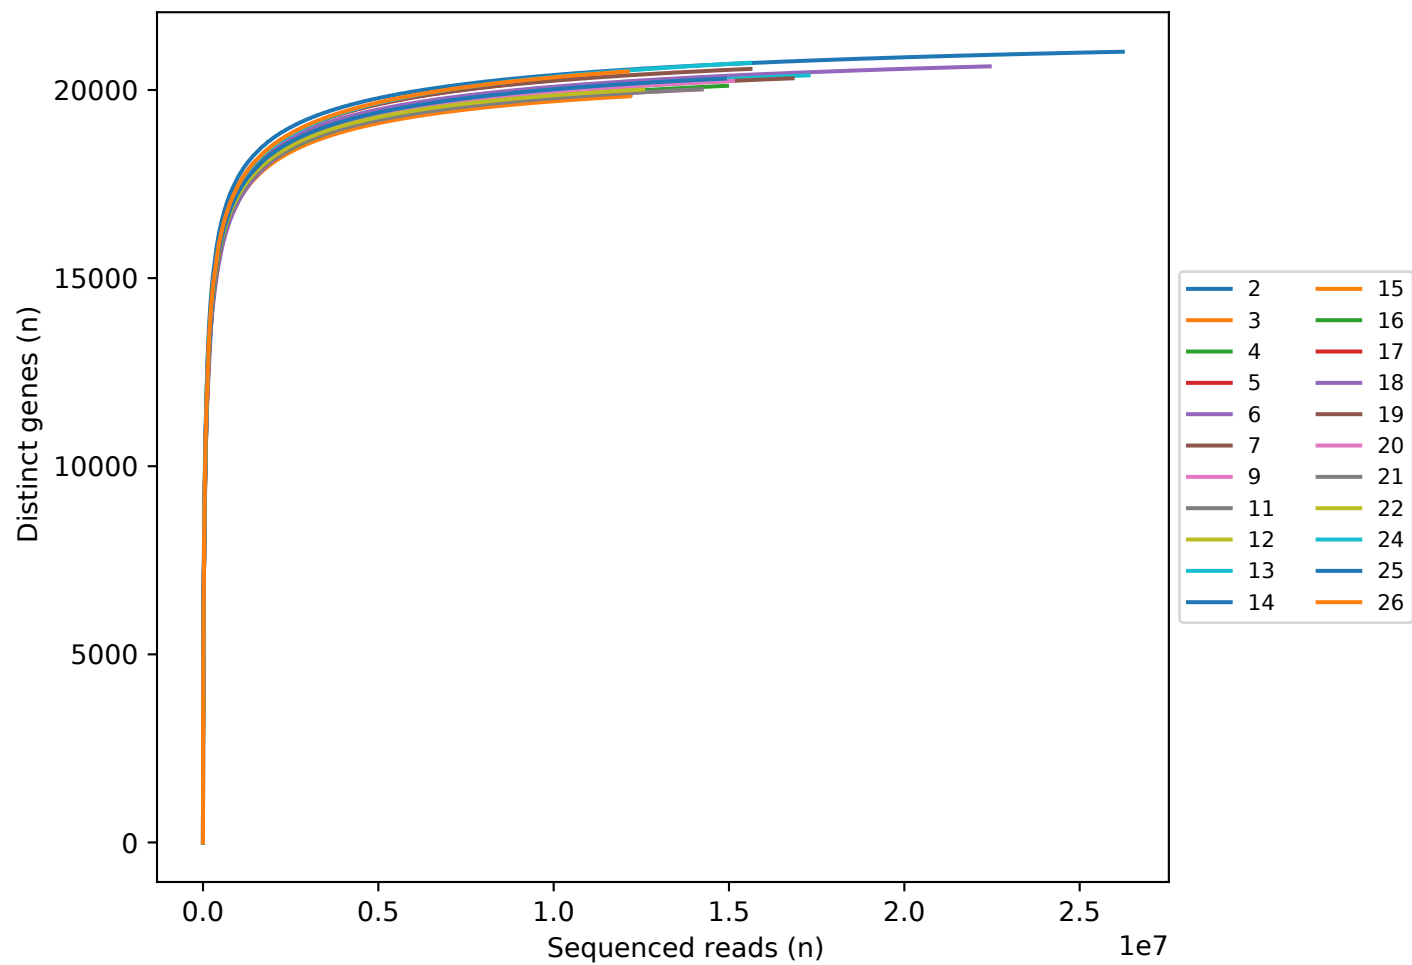

Supplement: s1 [file s1]

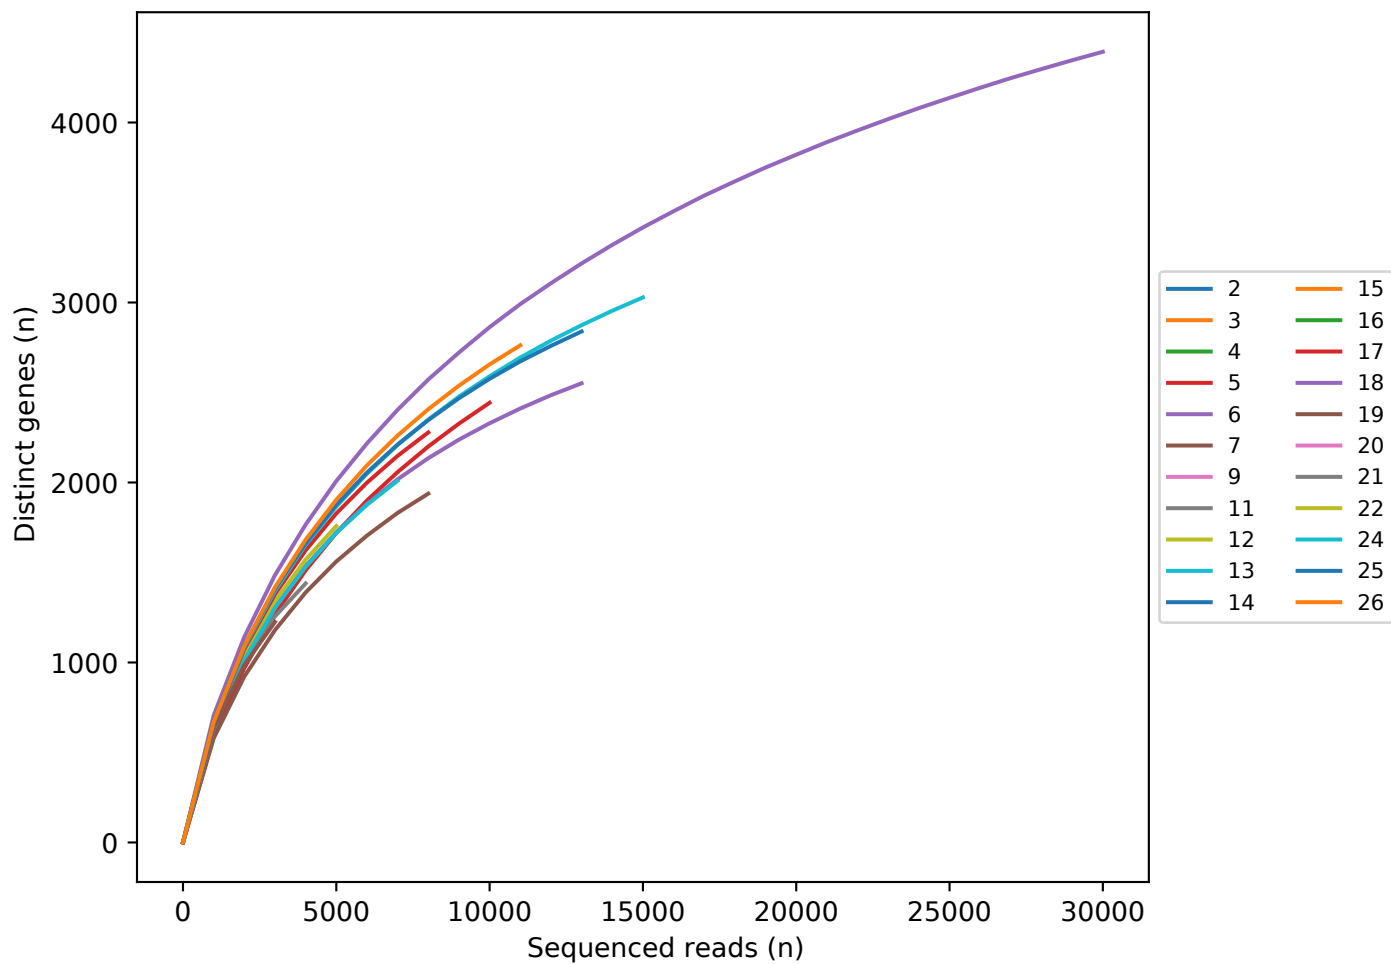

Supplement: s1 [file s1]
